CORRESPONDENCE

Anesthesiology  
1998; 88:1692  
© 1998 American Society of Anesthesiologists, Inc.  
Lippincott-Raven Publishers

### Who Is Ella Mae?

*To the Editor:*—We have had reusable laryngeal mask airways (LMA) at our hospital for several years. Recently this one (fig. 1) returned to our department after being gas sterilized.

**Dennis R. Stone, M.D.**  
Wolfson Children's Hospital  
Nemours Children's Clinic  
Jacksonville, Florida

*(Accepted for publication January 30, 1998.)*

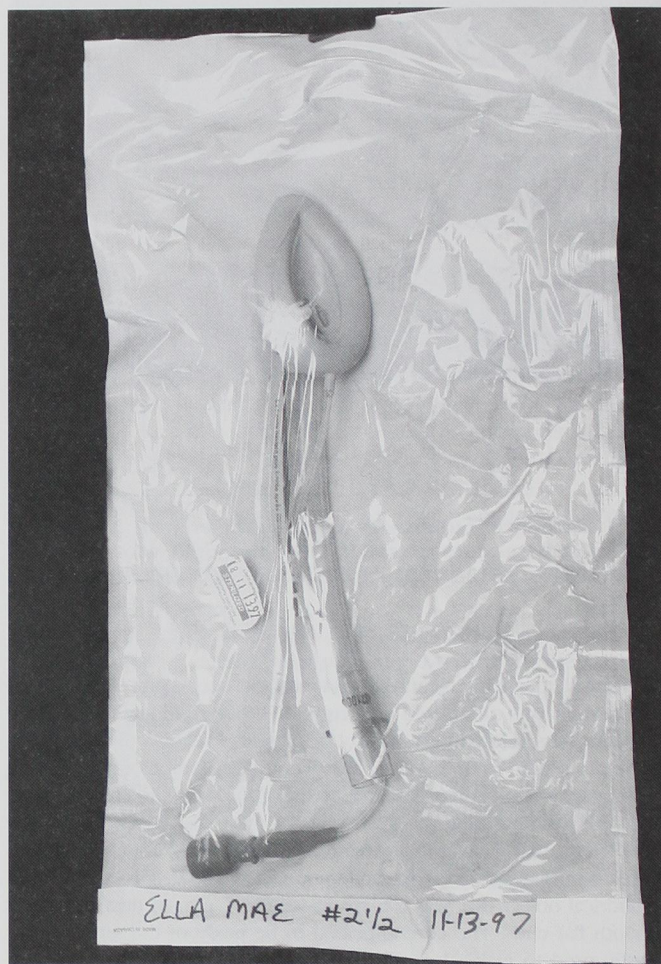

Fig. 1.
